# Supplementary material for: Protease and DNase Activities of a Very Stable High-Molecular-Mass Multiprotein Complex from Sea Cucumber Eupentacta fraudatrix
Source: MDPI journal article supplement (doi:10.3390/ijms23126677), 2022-06-15
Supplement: s1 [file s1]

## Supplementary data

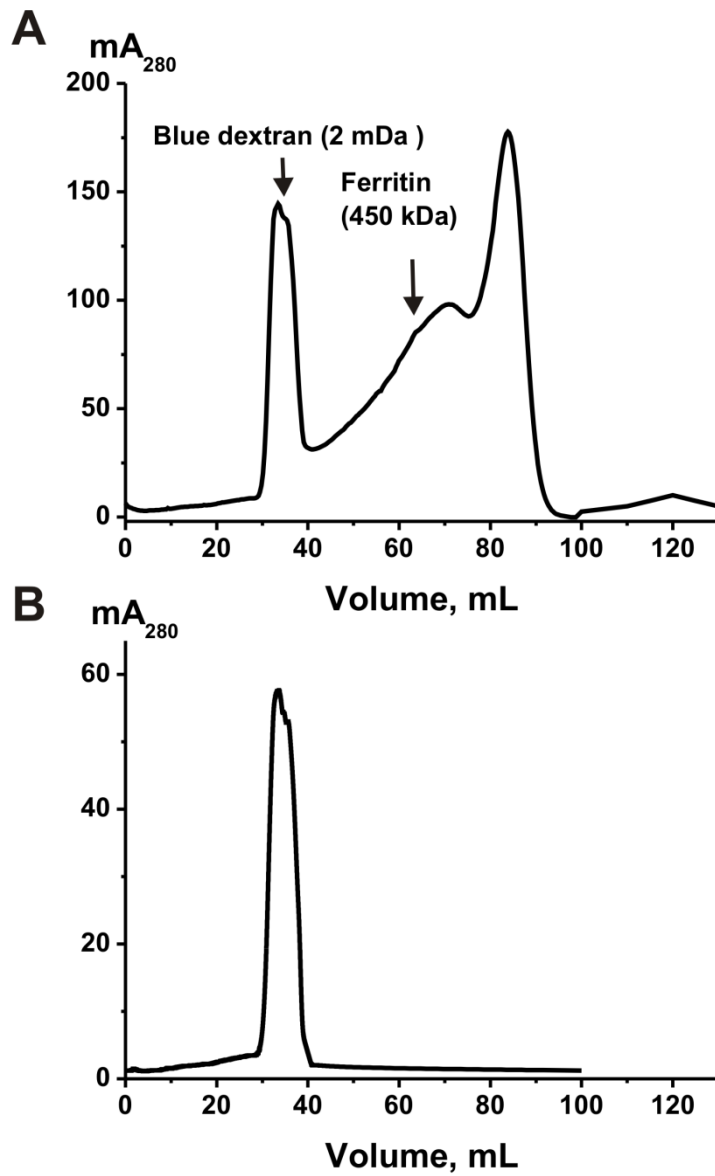

**Supplementary Figure S1.**

Isolation and of sea cucumber complex. Gel filtration of sea cucumber homogenate proteins on a Sepharose 4B column (A). Re-gel filtration of the purified complex (A) on the Sepharose 4B, ~2000 kDa (B). In all Panels, (—) - absorbance at 280 nm ( $A_{280}$ ).
